# Supplementary material
Source: Springer Nature journal article supplement (https://www.springermedizin.de/resource/supplementary/12937_2006_146_MOESM2_ESM.pdf/25654496)

□ Pre ■ Post

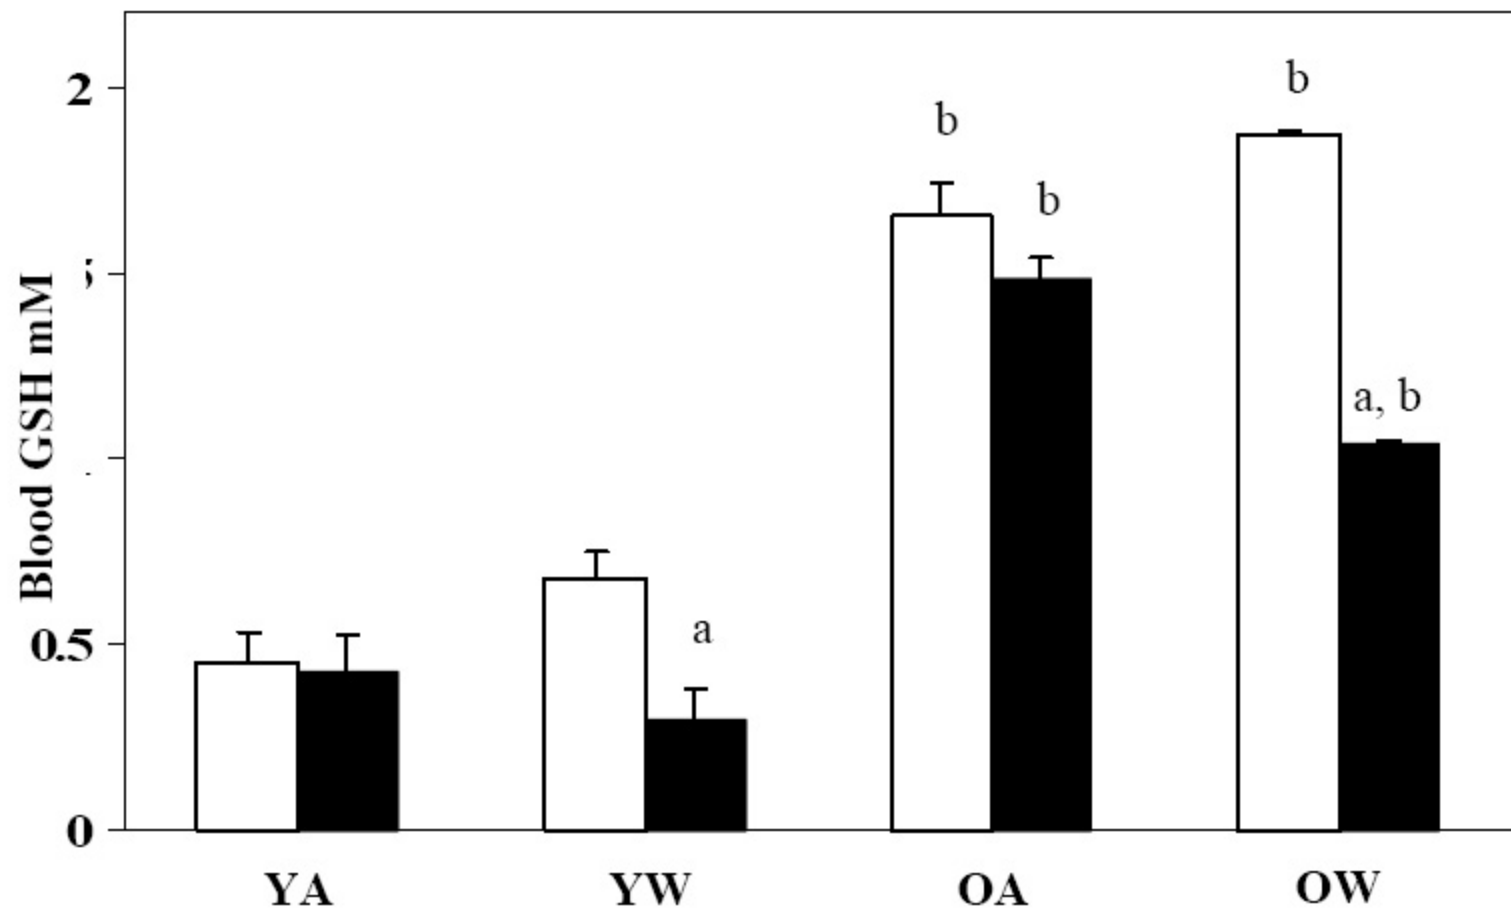

Supplement: MOESM2 [file 25654496]
